# Supplementary material
Source: Research Square preprint supplement (doi:10.21203/rs.3.rs-9131735/v1)
Supplement: Supplementary file 1 [file 68bbdc38c246e69f7658008f.docx]

Supplementary information for research entitled: Evaluating maize cultivars that were bred under nutrient-limited biodynamic-organic conditions. II. Field trials with farmers.

Authors: Walter A. Goldstein and James F. White.

Supplementary Table 1. Mineral concentrations in grain and stover of 17.461 and FOS8500 in 2019 and 2020.

|  |  | mineral concentration 17.461 in 2019 | | mineral concentration FOS8500 in 2019 | | mineral concentration 17 x 461 in 2020 | | mineral concentration FOS 8500 in 2020 | |
| --- | --- | --- | --- | --- | --- | --- | --- | --- | --- |
| parameter | unit | grain | stover | grain | stover | grain | stover | grain | stover |
| Total N % | % | 1.4250 | 0.9285 | 1.2700 | 0.8929 | 1.352 | 0.6774 | 1.1456 | 0.6474 |
| total C % | % | 44.77 | 44.175 | 44.40 | 44.39 | 45.62 | 44.59 | 45.4 | 45.02 |
| Ca | µg/g | 42.12 | 3614 | 35.08 | 2715 | 35.56 | 2468.19 | 28.79 | 2145.79 |
| Cu | µg/g | 3.910 | 7.154 | 3.898 | 8.743 | 2.145 | 4.720 | 1.025 | 4.605 |
| Fe | µg/g | 60.88 | 170.51 | 45.11 | 183.87 | 23.91 | 224.17 | 28.19 | 260.50 |
| K | µg/g | 4114 | 17716 | 3911 | 16034 | 4150 | 13487 | 4327 | 10861 |
| Mg | µg/g | 1244 | 2649 | 1073 | 2249 | 1294 | 2039 | 1129 | 1960 |
| Mn | µg/g | 5.657 | 30.02 | 4.234 | 35.62 | 6.081 | 34.412 | 4.300 | 43.103 |
| P | µg/g | 3382 | 3241 | 2828 | 3104 | 3451 | 3525 | 3030 | 3026 |
| S | µg/g | 1082.2 | 960.4 | 980.3 | 867 | 1183.2 | 716.1 | 957.6 | 648.3 |
| Zn | µg/g | 26.34 | 29.85 | 20.23 | 40.25 | 26.24 | 56.24 | 18.15 | 55.76 |
| Al | µg/g | 58.91 | 88.35 | 38.78 | 83.83 |  |  |  |  |
| Si | µg/g | 5.656 | 318.6 | 2.959 | 315.6 |  |  |  |  |
| Sr | µg/g | 0.0800 | 6.5000 | 0.0821 | 5.494 |  |  |  |  |
| Ti | µg/g | 0.1535 | 1.684 | 0.1471 | 1.639 |  |  |  |  |

Supplementary Table 2. Mineral uptake in grain and stover of 17.461 and FOS8500 in 2019 and 2020.

|  | 2019 | | | | | |
| --- | --- | --- | --- | --- | --- | --- |
|  | 17 x 461 | | | FOS 8500 | | |
| Parameter | Grain | Stover | Grain + Stover | Grain | Stover | Grain + Stover |
|  | kg/ha | | | | | |
| Total N | 138.1 | 59.2 | 197.3 | 133.9 | 46.6 | 180.5 |
| total C | 4201 | 2718 | 6918 | 4528 | 2202 | 6730 |
| Ca | 0.3750 | 22.3303 | 22.7003 | 0.3171 | 13.4408 | 13.7659 |
| Cu | 0.0388 | 0.0450 | 0.0837 | 0.0438 | 0.0442 | 0.0880 |
| Fe | 0.6297 | 1.0471 | 1.6770 | 0.4662 | 0.9060 | 1.3721 |
| K | 38.3 | 113.4 | 151.7 | 39.6 | 85.9 | 125.5 |
| Mg | 11.68 | 16.07 | 27.76 | 10.93 | 10.81 | 21.74 |
| Mn | 0.0525 | 0.1823 | 0.2345 | 0.0427 | 0.1697 | 0.2127 |
| P | 31.79 | 20.57 | 52.36 | 29.01 | 16.02 | 45.03 |
| S | 10.203 | 6.118 | 16.322 | 9.995 | 4.518 | 14.506 |
| Zn | 0.2528 | 0.1893 | 0.4421 | 0.1975 | 0.2060 | 0.4034 |
| Al | 0.5614 | 0.5262 | 1.0877 | 0.4407 | 0.4052 | 0.8459 |
| Si | 0.0492 | 1.9819 | 2.0313 | 0.0259 | 1.5066 | 1.5335 |
| Sr | 0.0007 | 0.0404 | 0.0410 | 0.0007 | 0.0275 | 0.0281 |
| Ti | 0.0015 | 0.0104 | 0.0120 | 0.0014 | 0.0081 | 0.0095 |
|  |  |  |  |  |  |  |
|  | 2020 | | | | | |
|  | 17 x 461 | | | FOS 8500 | | |
| Parameter | Grain | Stover | Grain + Stover | Grain | Stover | Grain + Stover |
|  | kg/ha | | | | | |
| Total N | 81.68 | 81.96 | 163.64 | 72.94 | 61.04 | 133.98 |
| total C | 2645 | 4162 | 6807 | 2685 | 3908 | 6593 |
| Ca | 0.1591 | 28.2200 | 28.3791 | 0.1671 | 19.1400 | 19.3071 |
| Cu | 0.0161 | 0.0596 | 0.0757 | 0.0063 | 0.0424 | 0.0487 |
| Fe | 0.1507 | 2.3350 | 2.4857 | 0.1824 | 2.1240 | 2.3064 |
| K | 24.24 | 158.96 | 183.20 | 25.61 | 99.16 | 124.77 |
| Mg | 7.564 | 21.300 | 28.864 | 6.685 | 16.395 | 23.080 |
| Mn | 0.0381 | 0.3689 | 0.407 | 0.0259 | 0.3882 | 0.4141 |
| P | 20.14 | 36.11 | 56.25 | 18.29 | 25.13 | 43.41 |
| S | 7.042 | 7.975 | 15.017 | 5.752 | 5.612 | 11.364 |
| Zn | 0.1577 | 0.5923 | 0.7500 | 0.1216 | 0.4646 | 0.5862 |
